# Supplementary material
Source: MDPI journal article supplement (https://www.mdpi.com/2304-6740/12/1/24)
Supplement: s1 [file s1]

Supplementary material

**Solvent influence in the synthesis of lead(II) complexes  
containing benzoate derivatives.**

José A. Ayllón<sup>a\*</sup>, Oriol Vallcorba<sup>b</sup> and Concepción Domingo.<sup>c</sup>

<sup>a</sup> *Departamento de Química, Universidad Autónoma de Barcelona, 08193-Bellaterra,  
Spain*

<sup>b</sup> *ALBA Synchrotron Light Source, 08290-Cerdanyola del Vallés, Spain*

<sup>c</sup> *Instituto de Ciencia de Materiales de Barcelona (CSIC), 08193 Bellaterra, Spain.*

**Table S1.** Crystallographic data of compound  $[\text{Pb}(\text{2MeOBz})_2(\text{H}_2\text{O})]_n$  (**2**), measured at different temperatures.

|                                                       | $[\text{Pb}(\text{2MeOBz})_2(\text{H}_2\text{O})]_n$ ( <b>2</b> ) | $[\text{Pb}(\text{2MeOBz})_2(\text{H}_2\text{O})]_n$ ( <b>2</b> ) |
|-------------------------------------------------------|-------------------------------------------------------------------|-------------------------------------------------------------------|
| Empirical formula                                     | $\text{C}_{32}\text{H}_{32}\text{O}_{14}\text{Pb}_2$              | $\text{C}_{32}\text{H}_{32}\text{O}_{14}\text{Pb}_2$              |
| Formula weigh                                         | 1054.98                                                           | 1054.98                                                           |
| $T$ (K)                                               | 100(2)                                                            | 295(2)                                                            |
| Wavelength (Å)                                        | 0.72932                                                           | 0.71073                                                           |
| System, space group                                   | Orthorhombic, $P 2_12_12_1$                                       | Orthorhombic, $P 2_12_12_1$                                       |
| Unit cell dimensions                                  |                                                                   |                                                                   |
| $a$ (Å)                                               | 7.240(4)                                                          | 7.2699(4)                                                         |
| $b$ (Å)                                               | 17.730(5)                                                         | 17.8650(9)                                                        |
| $c$ (Å)                                               | 25.480(5)                                                         | 25.6381(13)                                                       |
| $V$ (Å <sup>3</sup> )                                 | 3271(2)                                                           | 3329.8(3)                                                         |
| $Z$                                                   | 4                                                                 | 4                                                                 |
| $D_{\text{calc}}$ (g cm <sup>3</sup> )                | 2.142                                                             | 2.104                                                             |
| $\mu$ (mm <sup>-1</sup> )                             | 10.970                                                            | 10.168                                                            |
| $F(000)$                                              | 2000                                                              | 2000                                                              |
| Crystal size (mm <sup>3</sup> )                       | 0.045 x 0.020 x 0.005                                             | 0.210 x 0.060 x 0.040                                             |
| $hkl$ ranges                                          | -9 ≤ $h$ ≤ 9, -23 ≤ $k$ ≤ 23<br>-33 ≤ $l$ ≤ 33                    | -7 ≤ $h$ ≤ 9, -22 ≤ $k$ ≤ 21<br>-34 ≤ $l$ ≤ 33                    |
| $2\theta$ range (°)                                   | 1.436 to 29.091                                                   | 1.389 to 28.809                                                   |
| Reflections collected/<br>unique/[ $R_{\text{int}}$ ] | 49074/8066 [ $R_{\text{int}}$ ] =<br>0.0543]                      | 17924 / 7952 [ $R_{\text{int}}$ ] =<br>0.0367]                    |
| Completeness                                          | to $\theta$ = 25.950, 99.3%                                       | to $\theta$ = 25.242, 99.9%                                       |
| Refinement method                                     | Full-matrix least-squares on<br>$F^2$                             | Full-matrix least-squares on<br>$F^2$                             |
| Data/restraints/parameters                            | 8066 / 0 / 440                                                    | 7952 / 0 / 440                                                    |
| Goodness of fit (GOF) on $F^2$                        | 1.064                                                             | 1.012                                                             |
| Final $R$ indices [ $I > 2\sigma(I)$ ]                | $R_1 = 0.0316$ , $wR_2 = 0.0857$                                  | $R_1 = 0.0346$ , $wR_2 = 0.0562$                                  |
| $R$ indices (all data)                                | $R_1 = 0.0321$ , $wR_2 = 0.0861$                                  | $R_1 = 0.0450$ , $wR_2 = 0.0593$                                  |
| Extinction coefficient                                |                                                                   |                                                                   |
| Largest. Diff. peak and hole<br>(e Å <sup>-3</sup> )  | 5.365 and -1.651                                                  | 1.300 and -0.700                                                  |

**Table S2.** Selected bond distances (Å), angles (°), and intra- and intermolecular interactions (Å) for [Pb(2MeOBz)<sub>2</sub>(H<sub>2</sub>O)]<sub>n</sub> (**2**) measured at 100 K.

| Bond distances (Å) |          |                   |          |
|--------------------|----------|-------------------|----------|
| Pb(1)-O(2)         | 2.479(6) | Pb(1)-O(5)        | 2.451(5) |
| Pb(1)-O(6)         | 2.521(5) | Pb(1)-O(7)        | 2.714(7) |
| Pb(1)-O(8)         | 2.484(6) | Pb(1)-O(13)       | 2.614(5) |
| Pb(1)-O(1)#1       | 2.804(6) |                   |          |
| Pb(2)-O(1)         | 2.421(5) | Pb(2)-O(2)        | 2.545(6) |
| Pb(2)-O(3)         | 2.499(6) | Pb(2)-O(4)        | 2.543(7) |
| Pb(2)-O(5)         | 2.645(5) | Pb(2)-O(6)#2      | 2.593(6) |
| Pb(2)-O(14)        | 2.691(5) |                   |          |
| Bond angles (°)    |          |                   |          |
| O(6)-Pb(1)-O(7)    | 79.7(2)  | O(6)-Pb(1)-O(5)   | 52.0(2)  |
| O(6)-Pb(1)-O(8)    | 94.9(2)  | O(6)-Pb(1)-O(2)   | 121.1(2) |
| O(6)-Pb(1)-O(13)   | 81.3(2)  | O(6)-Pb(1)-O(1)#1 | 66.5(2)  |
| O(7)-Pb(1)-O(5)    | 106.2(2) | O(7)-Pb(1)-O(8)   | 50.1(2)  |
| O(7)-Pb(1)-O(2)    | 127.9(2) | O(7)-Pb(1)-O(13)  | 156.0(2) |
| O(7)-Pb(1)-O(1)#1  | 83.2(2)  | O(5)-Pb(1)-O(8)   | 79.2(2)  |
| O(5)-Pb(1)-O(2)    | 69.5(2)  | O(5)-Pb(1)-O(13)  | 72.6(2)  |
| O(5)-Pb(1)-O(1)#1  | 113.5(2) | O(8)-Pb(1)-O(2)   | 79.2(2)  |
| O(8)-Pb(1)-O(13)   | 146.9(2) | O(8)-Pb(1)-O(1)#1 | 132.9(2) |
| O(2)-Pb(1)-O(13)   | 75.0(2)  | O(2)-Pb(1)-O(1)#1 | 147.9(2) |
| O(13)-Pb(1)-O(1)#1 | 75.8(2)  |                   |          |
| O(3)-Pb(2)-O(1)    | 80.3(2)  | O(3)-Pb(2)-O(5)   | 83.5(2)  |
| O(3)-Pb(2)-O(2)    | 70.8(2)  | O(3)-Pb(2)-O(4)   | 51.8(2)  |
| O(3)-Pb(2)-O(14)   | 146.6(2) | O(3)-Pb(2)-O(6)#2 | 124.4(2) |
| O(1)-Pb(2)-O(5)    | 117.5(2) | O(1)-Pb(2)-O(2)   | 52.0(2)  |
| O(1)-Pb(2)-O(4)    | 73.9(2)  | O(1)-Pb(2)-O(14)  | 79.7(2)  |
| O(1)-Pb(2)-O(6)#2  | 71.4(2)  | O(5)-Pb(2)-O(2)   | 65.5(2)  |
| O(5)-Pb(2)-O(4)    | 132.8(2) | O(5)-Pb(2)-O(14)  | 82.3(2)  |
| O(5)-Pb(2)-O(6)#2  | 152.0(2) | O(2)-Pb(2)-O(4)   | 105.9(2) |
| O(2)-Pb(2)-O(14)   | 75.7(2)  | O(2)-Pb(2)-O(6)#2 | 118.9(2) |
| O(4)-Pb(2)-O(14)   | 143.1(2) | O(4)-Pb(2)-O(6)#2 | 74.4(2)  |
| O(14)-Pb(2)-O(6)#2 | 73.1(2)  |                   |          |

#1: -1+x,y,z    #2: 1+x,y,z

**Table S3.** Selected bond distances (Å), angles (°), intra- and intermolecular interactions (Å) for [Pb(2MeOBz)<sub>2</sub>(H<sub>2</sub>O)]<sub>n</sub> (**2**), measured at 295 K.

| Bond distances (Å) |          |                    |          |
|--------------------|----------|--------------------|----------|
| Pb(1)-O(2)         | 2.501(6) | Pb(1)-O(5)         | 2.455(6) |
| Pb(1)-O(6)         | 2.545(6) | Pb(1)-O(7)         | 2.711(8) |
| Pb(1)-O(8)         | 2.482(8) | Pb(1)-O(13)        | 2.636(5) |
| Pb(1)-O(1)#2       | 2.819(6) |                    |          |
| Pb(2)-O(1)         | 2.434(7) | Pb(2)-O(2)         | 2.535(7) |
| Pb(2)-O(3)         | 2.522(8) | Pb(2)-O(4)         | 2.513(8) |
| Pb(2)-O(5)         | 2.665(6) | Pb(2)-O(6)#1       | 2.611(6) |
| Pb(2)-O(14)        | 2.733(5) |                    |          |
| Bond angles (°)    |          |                    |          |
| O(6)-Pb(1)-O(7)    | 81.1(2)  | O(6)-Pb(1)-O(5)    | 51.7(2)  |
| O(6)-Pb(1)-O(8)    | 96.7(2)  | O(6)-Pb(1)-O(2)    | 121.2(2) |
| O(6)-Pb(1)-O(13)   | 81.0(2)  | O(6)-Pb(1)-O(1)#2  | 67.1(2)  |
| O(7)-Pb(1)-O(5)    | 106.1(2) | O(7)-Pb(1)-O(8)    | 49.8(2)  |
| O(7)-Pb(1)-O(2)    | 127.6(2) | O(7)-Pb(1)-O(13)   | 156.8(2) |
| O(7)-Pb(1)-O(1) #2 | 82.6(2)  | O(5)-Pb(1)-O(8)    | 79.7(2)  |
| O(5)-Pb(1)-O(2)    | 70.2(2)  | O(5)-Pb(1)-O(13)   | 73.7(2)  |
| O(5)-Pb(1)-O(1)#2  | 114.7(2) | O(8)-Pb(1)-O(2)    | 79.2(2)  |
| O(8)-Pb(1)-O(13)   | 147.7(2) | O(8)-Pb(1)-O(1)#2  | 132.1(2) |
| O(2)-Pb(1)-O(13)   | 74.8(2)  | O(2)-Pb(1)-O(1)#2  | 148.3(2) |
| O(13)-Pb(1)-O(1)#2 | 76.8(2)  |                    |          |
| O(3)-Pb(2)-O(1)    | 83.2(2)  | O(3)-Pb(2)-O(5)    | 84.5(2)  |
| O(3)-Pb(2)-O(2)    | 71.9(2)  | O(3)-Pb(2)-O(4)    | 50.9(2)  |
| O(3)-Pb(2)-O(14)   | 148.7(2) | O(3)-Pb(2)-O(6)#1  | 124.6(2) |
| O(1)-Pb(2)-O(5)    | 117.4(2) | O(1)-Pb(2)-O(2)    | 51.5(2)  |
| O(1)-Pb(2)-O(4)    | 74.4(2)  | O(1)-Pb(2)-O(14)   | 78.6(2)  |
| O(1)-Pb(2)-O(6)#1  | 72.1(2)  | O(5)-Pb(2)-O(2)    | 66.4(2)  |
| O(5)-Pb(2)-O(4)    | 133.6(2) | O(5) -Pb(2)-O(14)  | 81.6(2)  |
| O(5)-Pb(2)-O(6)#1  | 150.8(2) | O(2) -Pb(2)-O(4)   | 104.4(2) |
| O(2)-Pb(2)-O(14)   | 76.8(2)  | O(2) -Pb(2)-O(6)#1 | 120.0(2) |
| O(4)-Pb(2)-O(14)   | 143.0(2) | O(4) -Pb(2)-O(6)#1 | 74.6(2)  |
| O(14)-Pb(2)-O(6)#1 | 73.2(2)  |                    |          |

#1: -1+x,y,z    #2: 1+x,y,z

**Table S4.** Crystallographic data of compound  $[\text{Pb}(\text{1,4Bzdiox})_2(\text{H}_2\text{O})]_n$  (**4**)

|                                                              |                                                 |
|--------------------------------------------------------------|-------------------------------------------------|
| Empirical formula                                            | $\text{C}_{18}\text{H}_{16}\text{O}_9\text{Pb}$ |
| Formula weigh                                                | 583.51                                          |
| $T$ (K)                                                      | 298(2)                                          |
| Wavelength ( $\text{\AA}$ )                                  | 0.49603                                         |
| System, space group                                          | Orthorhombic, $I b a 2$                         |
| Unit cell dimensions                                         |                                                 |
| $a$ ( $\text{\AA}$ )                                         | 28.2828(7)                                      |
| $b$ ( $\text{\AA}$ )                                         | 15.4922(4)                                      |
| $c$ ( $\text{\AA}$ )                                         | 8.1896(2)                                       |
| $V$ ( $\text{\AA}^3$ )                                       | 3588.4(1)                                       |
| $Z$                                                          | 8                                               |
| $D_{\text{calc}}$ ( $\text{g cm}^3$ )                        | 2.160                                           |
| Measured $2\theta$ range ( $^\circ$ ), stepsize ( $^\circ$ ) | 1.026 to 45.246, 0.006                          |
| Rietveld refinement details:                                 |                                                 |
| Profile function                                             | Pseudo-Voigt                                    |
| $2\theta$ range used                                         | 1.106 to 33.000                                 |
| Num. of reflections                                          | 1527                                            |
| Data points                                                  | 5316                                            |
| Parameters                                                   | 93                                              |
| Restraints                                                   | 91                                              |
| $R_{\text{wp}}$                                              | 0.145                                           |
| $\chi_{\text{Rietveld}}/\chi_{\text{Pattern-Matching}}$      | 1.147                                           |

**Table S5.** Crystallographic data of compound [Pb(Ac)(Pip)<sub>2</sub>(MeOH)]<sub>n</sub> (**6**)

|                                                              |                                                               |
|--------------------------------------------------------------|---------------------------------------------------------------|
| Empirical formula                                            | C <sub>11</sub> H <sub>12</sub> O <sub>7</sub> Pb             |
| Formula weigh                                                | 463.41                                                        |
| <i>T</i> (K)                                                 | 100(2)                                                        |
| Wavelength (Å)                                               | 0.72932                                                       |
| System, space group                                          | Monoclinic, P2 <sub>1</sub> /c                                |
| Unit cell dimensions                                         |                                                               |
| <i>a</i> (Å)                                                 | 7.590(7)                                                      |
| <i>b</i> (Å)                                                 | 26.140(6)                                                     |
| <i>c</i> (Å)                                                 | 7.250(3)                                                      |
| $\alpha$ (°)                                                 | 90                                                            |
| $\beta$ (°)                                                  | 116.250(16)                                                   |
| $\gamma$ (°)                                                 | 90                                                            |
| <i>V</i> (Å <sup>3</sup> )                                   | 1290.1(13)                                                    |
| <i>Z</i>                                                     | 4                                                             |
| <i>D</i> <sub>calc</sub> (g cm <sup>3</sup> )                | 2.386                                                         |
| $\mu$ (mm <sup>-1</sup> )                                    | 13.887                                                        |
| <i>F</i> (000)                                               | 864                                                           |
| Crystal size (mm <sup>3</sup> )                              | 0.090 x 0.070 x 0.010                                         |
| <i>hkl</i> ranges                                            | -10 ≤ <i>h</i> ≤ 10, -34 ≤ <i>k</i> ≤ 34<br>-9 ≤ <i>l</i> ≤ 9 |
| 2 $\theta$ range (°)                                         | 3.071 to 29.088                                               |
| Reflections collected/<br>unique/[ <i>R</i> <sub>int</sub> ] | 19645 / 3045 [ <i>R</i> (int) =<br>0.0374]                    |
| Completeness                                                 | to $\theta$ = 25.950, 96.1%                                   |
| Refinement method                                            | Full-matrix least-squares on<br><i>F</i> <sup>2</sup>         |
| Data/restraints/parameters                                   | 3045 / 3 / 177                                                |
| Goodness of fit (GOF) on <i>F</i> <sup>2</sup>               | 1.145                                                         |
| Final <i>R</i> indices [ <i>I</i> > 2 $\sigma$ ( <i>I</i> )] | <i>R</i> 1 = 0.0656, <i>wR</i> 2 = 0.1846                     |
| <i>R</i> indices (all data)                                  | <i>R</i> 1 = 0.0695, <i>wR</i> 2 = 0.1885                     |
| Largest. Diff. peak and hole<br>(e Å <sup>-3</sup> )         | 5.110 and -1.804                                              |

**Table S6.** Selected bond distances (Å), angles (°), intra- and intermolecular interactions (Å) for [Pb(Ac)(Pip)<sub>2</sub>(MeOH)]<sub>n</sub> (**6**).

| Bond distances (Å)  |          |                     |          |
|---------------------|----------|---------------------|----------|
| Pb(1)-O(6)          | 2.536(7) | Pb(1)-O(3)          | 2.796(9) |
| Pb(1)-O(7)          | 2.66(1)  | Pb(1)-O(4)          | 2.475(8) |
| Pb(1)-O(5)          | 2.63(1)  | Pb(1)-O(6)#3        | 2.54(1)  |
| Pb(1)-O(3)#1        | 2.84(1)  | Pb(1)-O(5)#2        | 2.70(1)  |
| Bond angles (°)     |          |                     |          |
| O(6)-Pb(1)-O(3)     | 120.8(3) | O(6)-Pb(1)-O(7)     | 75.4(3)  |
| O(6)-Pb(1)-O(4)     | 74.1(3)  | O(6)-Pb(1)-O(5)     | 50.3(3)  |
| O(6)-Pb(1)-O(6)#3   | 66.5(3)  | O(6)-Pb(1)-O(3)#1   | 151.5(3) |
| O(6)-Pb(1)-O(5)#2   | 108.5(3) | O(3)-Pb(1)-O(7)     | 163.5(3) |
| O(3)-Pb(1)-O(4)     | 48.8(3)  | O(3)-Pb(1)-O(5)     | 96.8(3)  |
| O(3)-Pb(1)-O(6)     | 107.4(3) | O(3)-Pb(1)-O(3)#1   | 73.8(3)  |
| O(5)#2-Pb(1)-O(3)   | 92.7(3)  | O(7)-Pb(1)-O(4)     | 144.7(3) |
| O(7)-Pb(1)-O(5)     | 96.5(3)  | O(7)-Pb(1)-O(6)#3   | 75.1(3)  |
| O(7)-Pb(1)-O(3)#1   | 90.3(3)  | O(7)-Pb(1)-O(5)#2   | 83.9(3)  |
| O(4)-Pb(1)-O(5)     | 77.1(3)  | O(4)-Pb(1)-O(6)#3   | 76.8(3)  |
| O(4)-Pb(1)-O(3)#1   | 108.7(3) | O(4)-Pb(1)-O(5)#2   | 122.5(3) |
| O(5)-Pb(1)-O(6)#3   | 115.9(3) | O(5)-Pb(1)-O(3)#1   | 157.9(3) |
| O(5)-Pb(1)-O(5)#2   | 66.0(3)  | O(6)#3-Pb(1)-O(3)#1 | 86.2(3)  |
| O(6)#3-Pb(1)-O(5)#2 | 159.0(3) | O(3)#1-Pb(1)-O(5)#2 | 94.0(3)  |

#1: -x,1-y,1-z #2: 1-x,1-y,1-z #3: 1-x,1-y,2-z

## Supplementary Figures

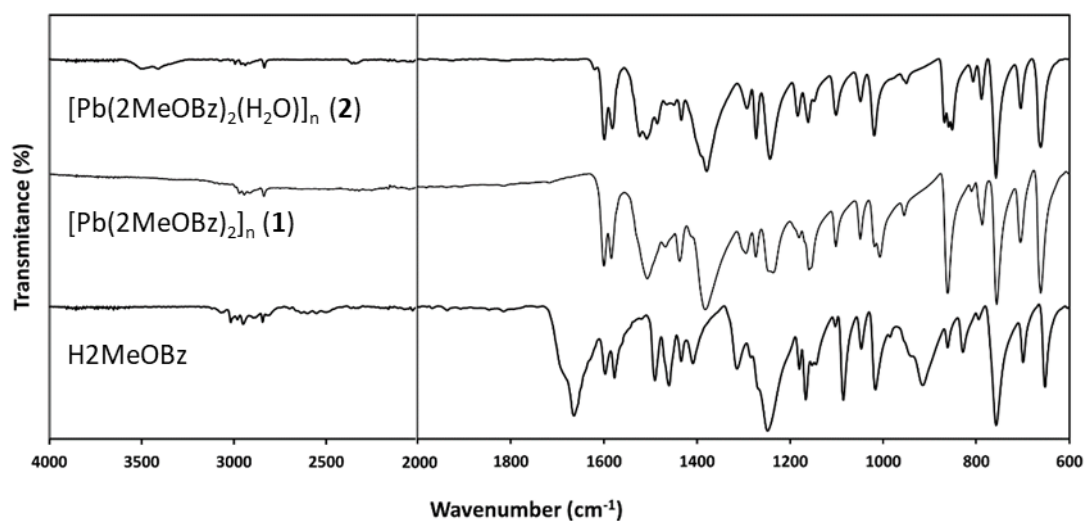

**Figure S1.** ATR-FTIR spectra of 2-methoxybenzoic acid (*bottom*) and of compounds [Pb(2MeOBz)<sub>2</sub>]<sub>n</sub> (1) (*middle*) and [Pb(2MeOBz)<sub>2</sub>(H<sub>2</sub>O)]<sub>n</sub> (2) (*up*).

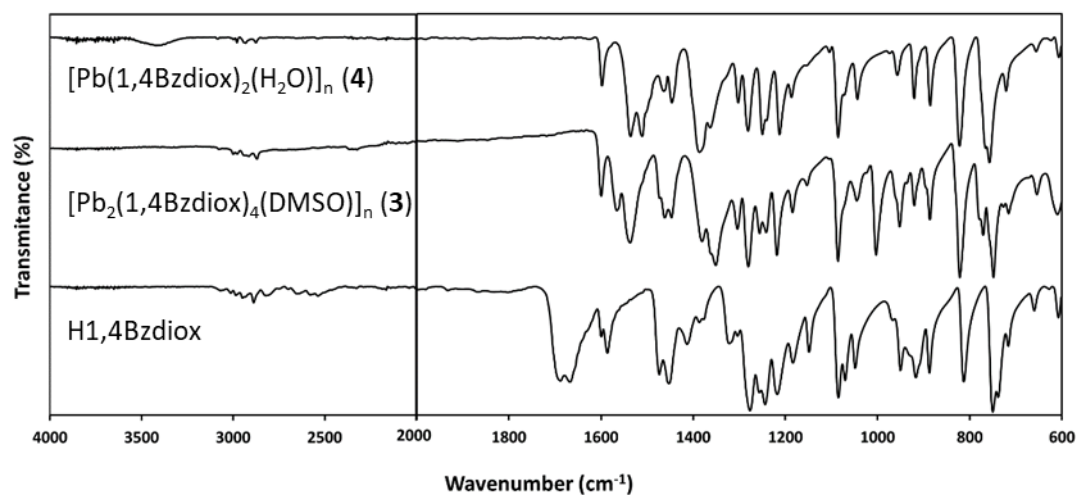

**Figure S2.** ATR-FTIR spectra of 1,4-benzodioxan-5-carboxylic acid (*bottom*) and of compounds [Pb<sub>2</sub>(1,4Bzdiox)<sub>4</sub>(DMSO)]<sub>n</sub> (3) (*middle*) and [Pb(1,4Bzdiox)<sub>2</sub>(H<sub>2</sub>O)]<sub>n</sub> (4) (*up*).



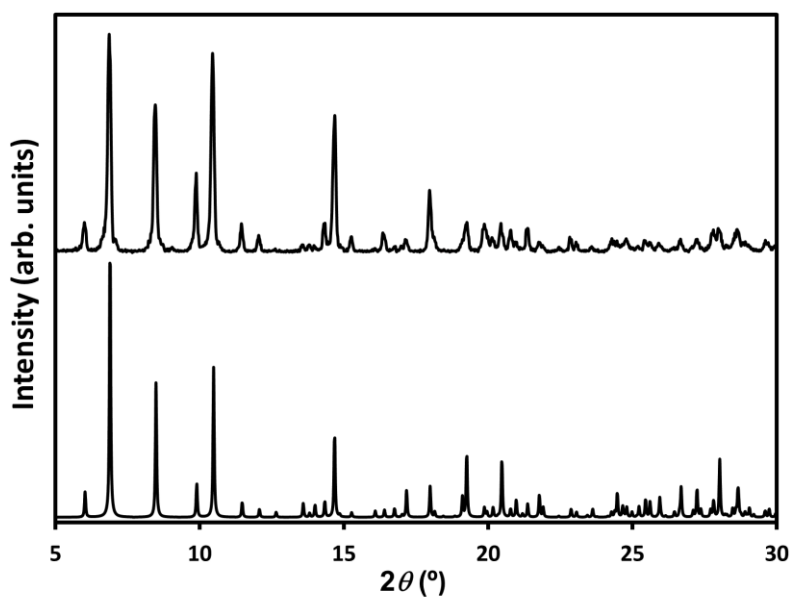

**Figure S3.** Comparison of powder XRD patterns collected at room temperature (*up*) for  $[\text{Pb}(\text{2MeOBz})_2(\text{H}_2\text{O})]_n$  (**2**) with the one calculated from single-crystal structural data at 295 K (*down*).

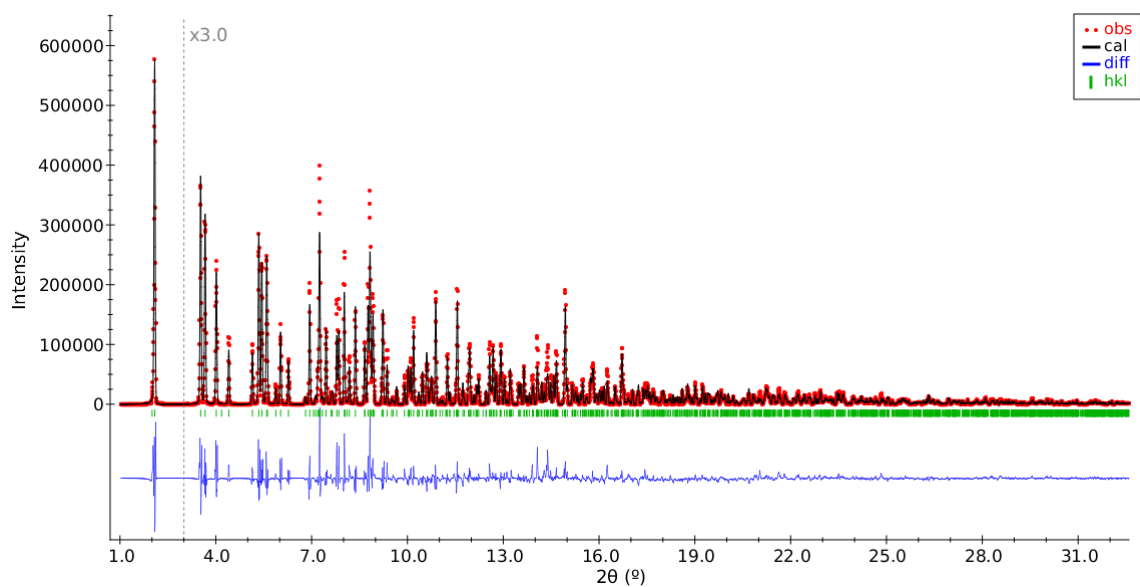

**Figure S4.** Rietveld fit of  $[\text{Pb}(\text{14Bzdiox})_2(\text{H}_2\text{O})]_n$  (**4**) to SR-XRPD data, showing calculated (**black**), observed (**red**), and difference (**blue**) intensities.

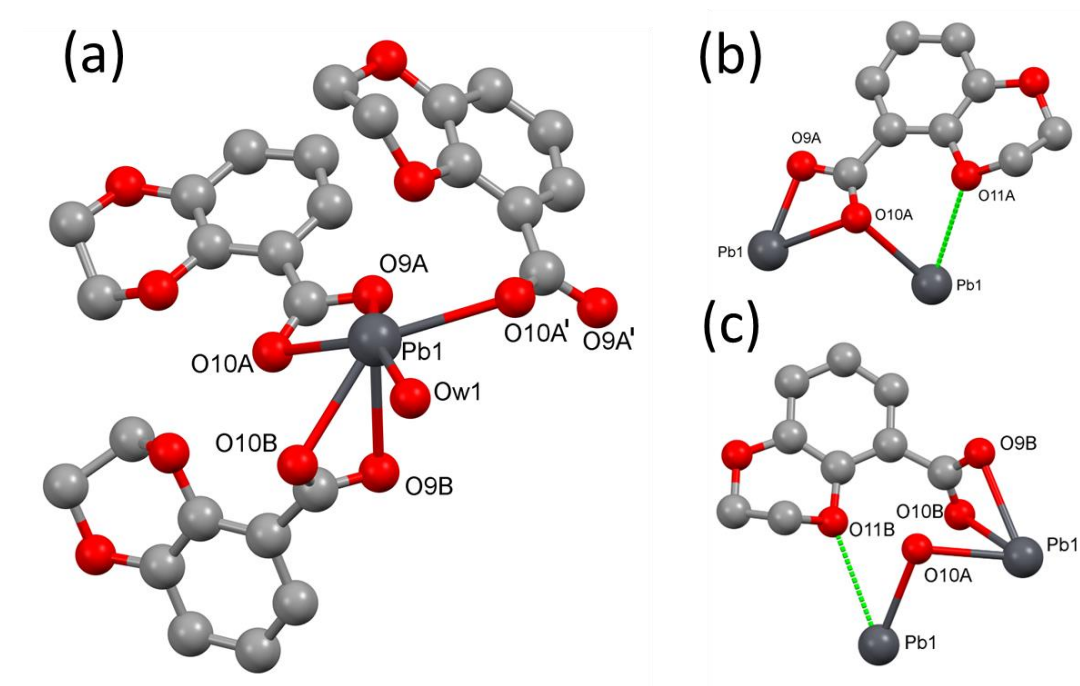

**Figure S5.** (a) Coordination sphere of each independent Pb(II) in 4. Hydrogen atoms are omitted for clarity. Only covalent Pb-O bonds are depicted. (b) and (c) Coordination modes of each independent 14Bzdiox ligand; distances longer than 2.74 Å are indicated with light green sticks. Color codes: dark gray (Pb), red (O), gray (C).

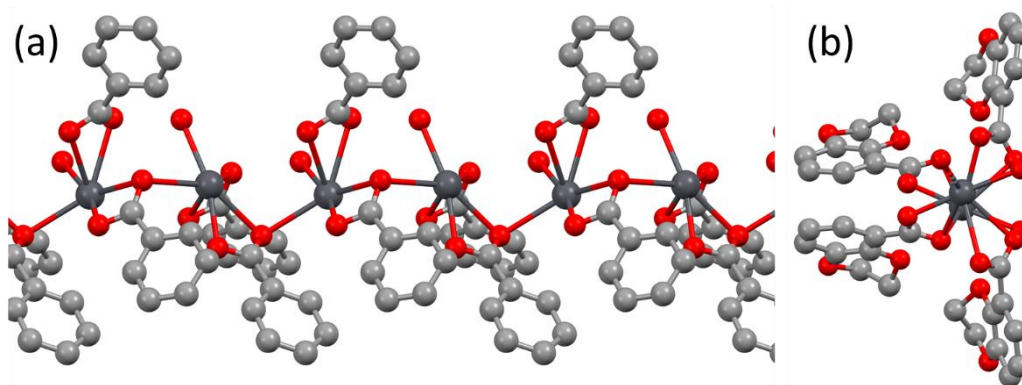

**Figure S6.** Crystal structure of compound 4: (a) chain view along *c* axis, (b) chain view along *a* axis.

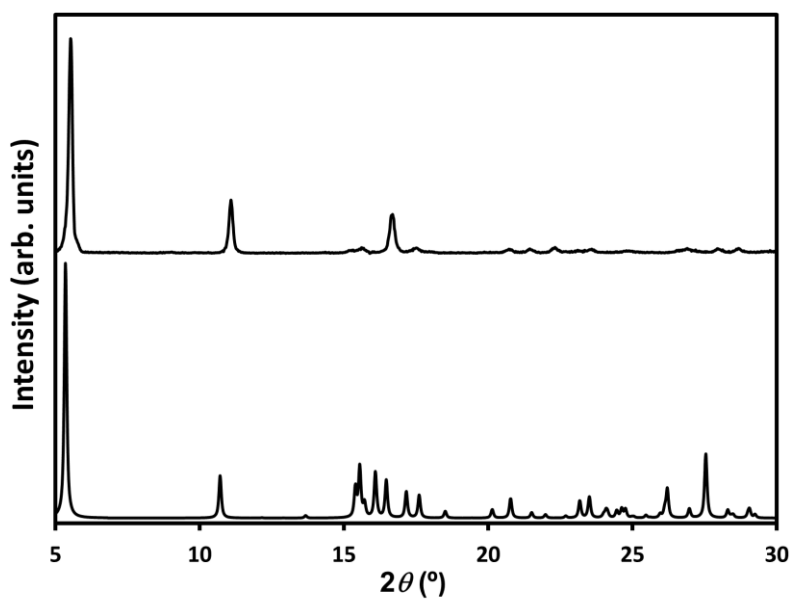

**Figure S7.** Comparison of powder XRD pattern collected at room temperature for  $[\text{Pb}(\text{Pip})_2(\text{H}_2\text{O})]_n$  (**1**) (*down*) with the one calculated from single-crystal structural data at 100 K of  $[\text{Cd}(\text{Pip})_2(\text{H}_2\text{O})]_n$  (*up*).<sup>1</sup>

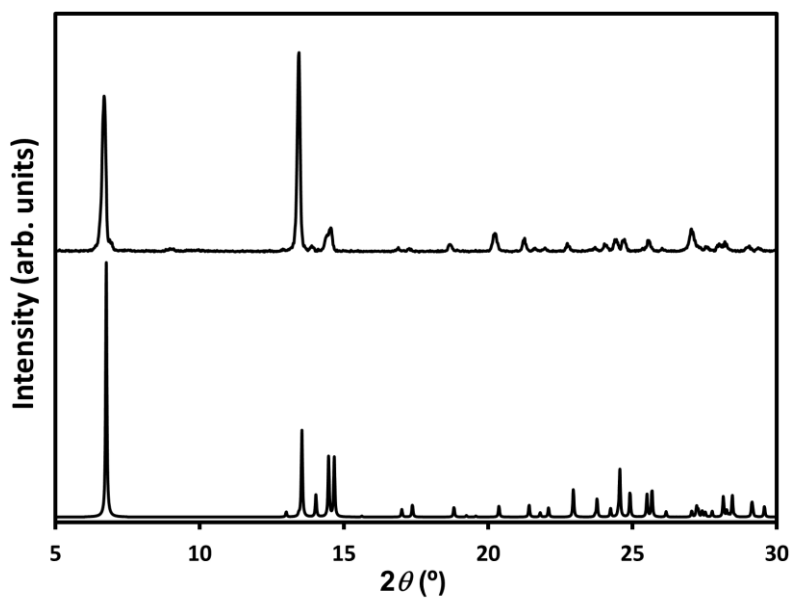

**Figure S8.** Comparison of powder XRD pattern collected at room temperature for  $[\text{Pb}(\text{Ac})(\text{Pip})(\text{MeOH})]_n$  (**5**) (*up*) with the one calculated from single-crystal structural data at 100 K (*down*).

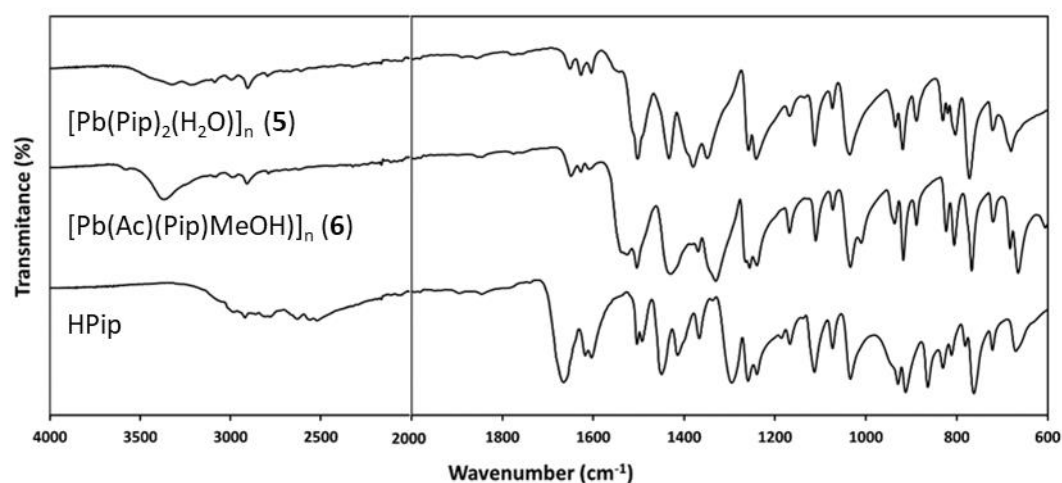

**Figure S9.** ATR-FTIR spectra of piperonylic acid (*bottom*) and of compounds  $[\text{Pb}(\text{Ac})(\text{Pip})(\text{MeOH})]_n$  (**6**) (*middle*) and  $[\text{Pb}(\text{Pip})_2(\text{H}_2\text{O})]_n$  (**5**) (*up*).

## Reference

- <sup>1</sup> Ejarque, D.; Sánchez-Férez, F.; Ayllón, J.A.; Calvet, T.; Font-Bardia, M.; Pons, J. Diverse Structures and Dimensionalities in Zn(II), Cd(II), and Hg(II) Metal Complexes with Piperonylic Acid. *Cryst. Growth Des.* **2020**, *20*, 383–400, doi:[10.1021/acs.cgd.9b01317](https://doi.org/10.1021/acs.cgd.9b01317)
